# Supplementary material for: Long-term plankton and environmental monitoring dataset from the marine protected area of the Iroise Marine Natural Park (2010–2023) in the Iroise Sea, North Atlantic
Source: Copernicus journal article supplement (doi:10.5194/essd-17-6583-2025), 2025-11-27
Supplement: Supplementary file 1 [file PNMI data paper supplementary files - Reviewed.pdf › PNMI data paper supplementary files - Reviewed.pdf]

**Table S1: Time coverage of the available zooplankton data.** Colored cells signify that there was a sampling done this month. Green signifies that the classification was checked a second time by Laëtitia Jalabert. The first sheet called “Transect sampling plan” contains the sampling plan for the transects B and D. The second sheet called “Coastal stations sampling plan” contains the sampling plan for the stations Douarnenez (D1), Molene and Sein.

5    See document Table S1.xlsx

**Table S2: Time coverage of the available phytoplankton data.** The first sheet called “Transect sampling plan” contains the sampling plan for the transects B and D. The second sheet called “Coastal stations sampling plan” contains the sampling plan for the stations Douarnenez (D1), Molene and Sein.

10    See document Table S2.xlsx

**Table S3: Time coverage of the available biological and environmental data**

| Data type                                                                          | Zone       | Time coverage                 |
|------------------------------------------------------------------------------------|------------|-------------------------------|
| Phytoplankton                                                                      | Douarnenez | January 2013 - December 2018  |
|                                                                                    | Sein       | April 2012 - November 2020    |
|                                                                                    | Molène     | May 2011 - November 2017      |
|                                                                                    | Transects  | October 2010 - September 2020 |
| Zooplankton                                                                        | Douarnenez | 2011, 2013-2021               |
|                                                                                    | Molène     | 2011 - 2013                   |
|                                                                                    | Transects  | 2010 - 2022                   |
| Environmental (surface and bottom temperature and salinity)                        |            | 2010-2013, 2015-2023          |
| Environmental (profiles of temperature, salinity, turbidity, oxygen, fluorescence) |            | 2016, 2018-2023               |

**Table S4: Names and associated ID number of all the Ecotaxa projects**

| Ecotaxa ID | Name of the project | Link to project |
|------------|---------------------|-----------------|
|------------|---------------------|-----------------|

|       |                                               |                                                                                                   |
|-------|-----------------------------------------------|---------------------------------------------------------------------------------------------------|
| 436   | Zooscan AMP pnmir WP2 200 2010                | <a href="https://ecotaxa.obs-vlfr.fr/gui/prj/436">https://ecotaxa.obs-vlfr.fr/gui/prj/436</a>     |
| 434   | Zooscan AMP WP2 200 2013 2015 sn001           | <a href="https://ecotaxa.obs-vlfr.fr/gui/prj/434">https://ecotaxa.obs-vlfr.fr/gui/prj/434</a>     |
| 435   | Zooscan AMP WP2 200 2013 2015 sn033           | <a href="https://ecotaxa.obs-vlfr.fr/gui/prj/435">https://ecotaxa.obs-vlfr.fr/gui/prj/435</a>     |
| 442   | Zooscan AMP WP2 200 2010 2011                 | <a href="https://ecotaxa.obs-vlfr.fr/gui/prj/442">https://ecotaxa.obs-vlfr.fr/gui/prj/442</a>     |
| 443   | Zooscan AMP WP2 200 2011 2012                 | <a href="https://ecotaxa.obs-vlfr.fr/gui/prj/443">https://ecotaxa.obs-vlfr.fr/gui/prj/443</a>     |
| 468   | Zooscan AMP pnmir WP2 200 2011 2012 2013 2014 | <a href="https://ecotaxa.obs-vlfr.fr/gui/prj/468">https://ecotaxa.obs-vlfr.fr/gui/prj/468</a>     |
| 826   | Zooscan AMP pnmir WP2 200 2016                | <a href="https://ecotaxa.obs-vlfr.fr/gui/prj/826">https://ecotaxa.obs-vlfr.fr/gui/prj/826</a>     |
| 1140  | Zooscan AMP Douarnenez WP2 200 2015 2016 2017 | <a href="https://ecotaxa.obs-vlfr.fr/gui/prj/1140">https://ecotaxa.obs-vlfr.fr/gui/prj/1140</a>   |
| 1244  | Zooscan AMP pnmir WP2 200 2017                | <a href="https://ecotaxa.obs-vlfr.fr/gui/prj/1244">https://ecotaxa.obs-vlfr.fr/gui/prj/1244</a>   |
| 3847  | Zooscan AMP pnmir WP2 200 2018                | <a href="https://ecotaxa.obs-vlfr.fr/gui/prj/3847">https://ecotaxa.obs-vlfr.fr/gui/prj/3847</a>   |
| 3848  | Zooscan AMP pnmir WP2 200 2019                | <a href="https://ecotaxa.obs-vlfr.fr/gui/prj/3848">https://ecotaxa.obs-vlfr.fr/gui/prj/3848</a>   |
| 3849  | Zooscan AMP pnmir WP2 200 2020                | <a href="https://ecotaxa.obs-vlfr.fr/gui/prj/3849">https://ecotaxa.obs-vlfr.fr/gui/prj/3849</a>   |
| 5759  | Zooscan AMP pnmir WP2 200 2021                | <a href="https://ecotaxa.obs-vlfr.fr/gui/prj/5759">https://ecotaxa.obs-vlfr.fr/gui/prj/5759</a>   |
| 6448  | Zooscan AMP pnmir WP2 200 2022                | <a href="https://ecotaxa.obs-vlfr.fr/gui/prj/6448">https://ecotaxa.obs-vlfr.fr/gui/prj/6448</a>   |
| 8055  | Zooscan AMP Douarnenez WP2 200 2011           | <a href="https://ecotaxa.obs-vlfr.fr/gui/prj/8055">https://ecotaxa.obs-vlfr.fr/gui/prj/8055</a>   |
| 9297  | Zooscan AMP Douarnenez WP2 200 2021           | <a href="https://ecotaxa.obs-vlfr.fr/gui/prj/9297">https://ecotaxa.obs-vlfr.fr/gui/prj/9297</a>   |
| 9318  | Zooscan AMP Douarnenez WP2 200 2018 2019 2020 | <a href="https://ecotaxa.obs-vlfr.fr/gui/prj/9318">https://ecotaxa.obs-vlfr.fr/gui/prj/9318</a>   |
| 11128 | Zooscan AMP pnmir WP2 200 2023                | <a href="https://ecotaxa.obs-vlfr.fr/gui/prj/11128">https://ecotaxa.obs-vlfr.fr/gui/prj/11128</a> |
