# Supplementary material for: Long-term plankton and environmental monitoring dataset from the marine protected area of the Iroise Marine Natural Park (2010–2023) in the Iroise Sea, North Atlantic
Source: Copernicus journal article supplement (doi:10.5194/essd-17-6583-2025), 2025-11-27
Supplement: Supplementary file 3 [file Table S2.xlsx]

## Sheet: Transect sampling plan
Transect	Station	Date (DD/MM/YYYY)	Season
B	B1	02/05/2010	spring
B	B2	02/05/2010	spring
B	B3	02/05/2010	spring
B	B6	02/05/2010	spring
B	B7	02/05/2010	spring
B	B4	03/05/2010	spring
B	B5	03/05/2010	spring
B	B1	25/10/2010	autumn
B	B2	25/10/2010	autumn
B	B3	25/10/2010	autumn
B	B4	25/10/2010	autumn
B	B5	25/10/2010	autumn
B	B5	04/07/2011	summer
B	B6	04/07/2011	summer
B	B7	04/07/2011	summer
B	B1	05/07/2011	summer
B	B2	05/07/2011	summer
B	B3	05/07/2011	summer
B	B4	05/07/2011	summer
B	B1	11/10/2011	autumn
B	B2	11/10/2011	autumn
B	B3	11/10/2011	autumn
B	B4	11/10/2011	autumn
B	B5	11/10/2011	autumn
B	B6	12/10/2011	autumn
B	B7	12/10/2011	autumn
B	B1	02/05/2012	spring
B	B2	02/05/2012	spring
B	B3	02/05/2012	spring
B	B4	02/05/2012	spring
B	B5	02/05/2012	spring
B	B6	02/05/2012	spring
B	B7	02/05/2012	spring
B	B1	10/07/2012	summer
B	B2	10/07/2012	summer
B	B3	10/07/2012	summer
B	B1	03/06/2013	summer
B	B2	03/06/2013	summer
B	B3	03/06/2013	summer
B	B4	04/06/2013	summer
B	B5	04/06/2013	summer
B	B6	04/06/2013	summer
B	B7	04/06/2013	summer
B	B1	02/07/2013	summer
B	B2	02/07/2013	summer
B	B3	02/07/2013	summer
B	B4	02/07/2013	summer
B	B5	02/07/2013	summer
B	B6	02/07/2013	summer
B	B3	01/10/2013	autumn
B	B4	01/10/2013	autumn
B	B5	01/10/2013	autumn
B	B6	01/10/2013	autumn
B	B1	03/10/2013	autumn
B	B2	03/10/2013	autumn
B	B1	28/04/2015	spring
B	B2	28/04/2015	spring
B	B3	28/04/2015	spring
B	B4	28/04/2015	spring
B	B5	28/04/2015	spring
B	B3	09/07/2015	summer
B	B4	09/07/2015	summer
B	B5	09/07/2015	summer
B	B6	09/07/2015	summer
B	B7	09/07/2015	summer
B	B1	10/07/2015	summer
B	B2	10/07/2015	summer
B	B1	07/10/2015	autumn
B	B2	07/10/2015	autumn
B	B3	08/10/2015	autumn
B	B4	08/10/2015	autumn
B	B5	09/10/2015	autumn
B	B6	09/10/2015	autumn
B	B7	09/10/2015	autumn
B	B3	06/07/2016	summer
B	B3	06/07/2016	summer
B	B3	06/07/2016	summer
B	B3	06/07/2016	summer
B	B3	06/07/2016	summer
B	B3	06/07/2016	summer
B	B3	06/07/2016	summer
B	B3	06/07/2016	summer
B	B3	06/07/2016	summer
B	B3	06/07/2016	summer
B	B4	06/07/2016	summer
B	B4	06/07/2016	summer
B	B4	06/07/2016	summer
B	B4	06/07/2016	summer
B	B4	06/07/2016	summer
B	B4	06/07/2016	summer
B	B4	06/07/2016	summer
B	B4	06/07/2016	summer
B	B4	06/07/2016	summer
B	B4	06/07/2016	summer
B	B4	06/07/2016	summer
B	B4	06/07/2016	summer
B	B4	06/07/2016	summer
B	B4	06/07/2016	summer
B	B4	06/07/2016	summer
B	B4	06/07/2016	summer
B	B4	06/07/2016	summer
B	B4	06/07/2016	summer
B	B4	06/07/2016	summer
B	B4	06/07/2016	summer
B	B5	06/07/2016	summer
B	B5	06/07/2016	summer
B	B5	06/07/2016	summer
B	B5	06/07/2016	summer
B	B5	06/07/2016	summer
B	B5	06/07/2016	summer
B	B5	06/07/2016	summer
B	B5	06/07/2016	summer
B	B5	06/07/2016	summer
B	B5	06/07/2016	summer
B	B5	06/07/2016	summer
B	B5	06/07/2016	summer
B	B5	06/07/2016	summer
B	B5	06/07/2016	summer
B	B5	06/07/2016	summer
B	B5	06/07/2016	summer
B	B5	06/07/2016	summer
B	B5	06/07/2016	summer
B	B5	06/07/2016	summer
B	B5	06/07/2016	summer
B	B5	06/07/2016	summer
B	B5	06/07/2016	summer
B	B5	06/07/2016	summer
B	B5	06/07/2016	summer
B	B5	06/07/2016	summer
B	B5	06/07/2016	summer
B	B5	06/07/2016	summer
B	B5	06/07/2016	summer
B	B5	06/07/2016	summer
B	B5	06/07/2016	summer
B	B5	06/07/2016	summer
B	B5	06/07/2016	summer
B	B6	06/07/2016	summer
B	B6	06/07/2016	summer
B	B6	06/07/2016	summer
B	B6	06/07/2016	summer
B	B6	06/07/2016	summer
B	B6	06/07/2016	summer
B	B6	06/07/2016	summer
B	B6	06/07/2016	summer
B	B6	06/07/2016	summer
B	B6	06/07/2016	summer
B	B6	06/07/2016	summer
B	B6	06/07/2016	summer
B	B6	06/07/2016	summer
B	B6	06/07/2016	summer
B	B6	06/07/2016	summer
B	B6	06/07/2016	summer
B	B6	06/07/2016	summer
B	B6	06/07/2016	summer
B	B6	06/07/2016	summer
B	B6	06/07/2016	summer
B	B6	06/07/2016	summer
B	B6	06/07/2016	summer
B	B6	06/07/2016	summer
B	B6	06/07/2016	summer
B	B6	06/07/2016	summer
B	B6	06/07/2016	summer
B	B6	06/07/2016	summer
B	B6	06/07/2016	summer
B	B6	06/07/2016	summer
B	B6	06/07/2016	summer
B	B6	06/07/2016	summer
B	B6	06/07/2016	summer
B	B7	06/07/2016	summer
B	B7	06/07/2016	summer
B	B7	06/07/2016	summer
B	B7	06/07/2016	summer
B	B7	06/07/2016	summer
B	B7	06/07/2016	summer
B	B7	06/07/2016	summer
B	B7	06/07/2016	summer
B	B7	06/07/2016	summer
B	B7	06/07/2016	summer
B	B7	06/07/2016	summer
B	B7	06/07/2016	summer
B	B7	06/07/2016	summer
B	B7	06/07/2016	summer
B	B7	06/07/2016	summer
B	B7	06/07/2016	summer
B	B7	06/07/2016	summer
B	B7	06/07/2016	summer
B	B7	06/07/2016	summer
B	B7	06/07/2016	summer
B	B7	06/07/2016	summer
B	B7	06/07/2016	summer
B	B7	06/07/2016	summer
B	B7	06/07/2016	summer
B	B1	07/07/2016	summer
B	B1	07/07/2016	summer
B	B1	07/07/2016	summer
B	B1	07/07/2016	summer
B	B1	07/07/2016	summer
B	B1	07/07/2016	summer
B	B1	07/07/2016	summer
B	B2	07/07/2016	summer
B	B2	07/07/2016	summer
B	B2	07/07/2016	summer
B	B2	07/07/2016	summer
B	B2	07/07/2016	summer
B	B2	07/07/2016	summer
B	B2	07/07/2016	summer
B	B1	06/09/2016	autumn
B	B2	06/09/2016	autumn
B	B3	06/09/2016	autumn
B	B4	06/09/2016	autumn
B	B5	06/09/2016	autumn
B	B6	06/09/2016	autumn
B	B7	06/09/2016	autumn
B	B1	06/04/2017	spring
B	B2	06/04/2017	spring
B	B3	06/04/2017	spring
B	B4	06/04/2017	spring
B	B5	06/04/2017	spring
B	B6	06/04/2017	spring
B	B7	06/04/2017	spring
B	B4	29/05/2017	spring
B	B5	29/05/2017	spring
B	B6	29/05/2017	spring
B	B7	29/05/2017	spring
B	B1	30/05/2017	spring
B	B2	30/05/2017	spring
B	B3	30/05/2017	spring
B	B1	12/07/2017	summer
B	B2	12/07/2017	summer
B	B3	12/07/2017	summer
B	B4	12/07/2017	summer
B	B5	13/07/2017	summer
B	B6	13/07/2017	summer
B	B7	13/07/2017	summer
B	B1	26/10/2017	autumn
B	B2	26/10/2017	autumn
B	B3	26/10/2017	autumn
B	B4	26/10/2017	autumn
B	B5	26/10/2017	autumn
B	B6	26/10/2017	autumn
B	B7	26/10/2017	autumn
B	B1	10/04/2018	spring
B	B2	10/04/2018	spring
B	B3	10/04/2018	spring
B	B4	10/04/2018	spring
B	B5	10/04/2018	spring
B	B6	10/04/2018	spring
B	B7	10/04/2018	spring
B	B1	24/05/2018	spring
B	B2	24/05/2018	spring
B	B3	24/05/2018	spring
B	B4	24/05/2018	spring
B	B5	24/05/2018	spring
B	B6	24/05/2018	spring
B	B7	24/05/2018	spring
B	B1	05/07/2018	summer
B	B2	05/07/2018	summer
B	B2	05/07/2018	summer
B	B2	05/07/2018	summer
B	B2	05/07/2018	summer
B	B2	05/07/2018	summer
B	B2	05/07/2018	summer
B	B3	05/07/2018	summer
B	B3	05/07/2018	summer
B	B3	05/07/2018	summer
B	B3	05/07/2018	summer
B	B3	05/07/2018	summer
B	B4	05/07/2018	summer
B	B4	05/07/2018	summer
B	B4	05/07/2018	summer
B	B4	05/07/2018	summer
B	B4	05/07/2018	summer
B	B4	05/07/2018	summer
B	B4	05/07/2018	summer
B	B4	05/07/2018	summer
B	B4	05/07/2018	summer
B	B4	05/07/2018	summer
B	B5	05/07/2018	summer
B	B5	05/07/2018	summer
B	B5	05/07/2018	summer
B	B5	05/07/2018	summer
B	B5	05/07/2018	summer
B	B5	05/07/2018	summer
B	B5	05/07/2018	summer
B	B5	05/07/2018	summer
B	B5	05/07/2018	summer
B	B5	05/07/2018	summer
B	B5	05/07/2018	summer
B	B5	05/07/2018	summer
B	B5	05/07/2018	summer
B	B5	05/07/2018	summer
B	B6	05/07/2018	summer
B	B6	05/07/2018	summer
B	B6	05/07/2018	summer
B	B6	05/07/2018	summer
B	B6	05/07/2018	summer
B	B6	05/07/2018	summer
B	B6	05/07/2018	summer
B	B6	05/07/2018	summer
B	B6	05/07/2018	summer
B	B6	05/07/2018	summer
B	B6	05/07/2018	summer
B	B6	05/07/2018	summer
B	B6	05/07/2018	summer
B	B6	05/07/2018	summer
B	B6	05/07/2018	summer
B	B6	05/07/2018	summer
B	B7	05/07/2018	summer
B	B7	05/07/2018	summer
B	B7	05/07/2018	summer
B	B7	05/07/2018	summer
B	B7	05/07/2018	summer
B	B7	05/07/2018	summer
B	B7	05/07/2018	summer
B	B7	05/07/2018	summer
B	B7	05/07/2018	summer
B	B7	05/07/2018	summer
B	B7	05/07/2018	summer
B	B7	05/07/2018	summer
B	B7	05/07/2018	summer
B	B7	05/07/2018	summer
B	B7	05/07/2018	summer
B	B1	13/09/2018	autumn
B	B1	13/09/2018	autumn
B	B1	13/09/2018	autumn
B	B1	13/09/2018	autumn
B	B1	13/09/2018	autumn
B	B1	13/09/2018	autumn
B	B1	13/09/2018	autumn
B	B1	13/09/2018	autumn
B	B1	13/09/2018	autumn
B	B1	13/09/2018	autumn
B	B1	13/09/2018	autumn
B	B1	13/09/2018	autumn
B	B1	13/09/2018	autumn
B	B1	13/09/2018	autumn
B	B1	13/09/2018	autumn
B	B1	13/09/2018	autumn
B	B1	13/09/2018	autumn
B	B1	13/09/2018	autumn
B	B1	13/09/2018	autumn
B	B1	13/09/2018	autumn
B	B1	13/09/2018	autumn
B	B1	13/09/2018	autumn
B	B1	13/09/2018	autumn
B	B1	13/09/2018	autumn
B	B1	13/09/2018	autumn
B	B1	13/09/2018	autumn
B	B1	13/09/2018	autumn
B	B1	13/09/2018	autumn
B	B1	13/09/2018	autumn
B	B2	13/09/2018	autumn
B	B2	13/09/2018	autumn
B	B2	13/09/2018	autumn
B	B2	13/09/2018	autumn
B	B2	13/09/2018	autumn
B	B2	13/09/2018	autumn
B	B2	13/09/2018	autumn
B	B2	13/09/2018	autumn
B	B2	13/09/2018	autumn
B	B2	13/09/2018	autumn
B	B2	13/09/2018	autumn
B	B2	13/09/2018	autumn
B	B2	13/09/2018	autumn
B	B2	13/09/2018	autumn
B	B2	13/09/2018	autumn
B	B2	13/09/2018	autumn
B	B2	13/09/2018	autumn
B	B2	13/09/2018	autumn
B	B2	13/09/2018	autumn
B	B2	13/09/2018	autumn
B	B2	13/09/2018	autumn
B	B2	13/09/2018	autumn
B	B2	13/09/2018	autumn
B	B2	13/09/2018	autumn
B	B3	13/09/2018	autumn
B	B3	13/09/2018	autumn
B	B3	13/09/2018	autumn
B	B3	13/09/2018	autumn
B	B3	13/09/2018	autumn
B	B3	13/09/2018	autumn
B	B3	13/09/2018	autumn
B	B3	13/09/2018	autumn
B	B3	13/09/2018	autumn
B	B3	13/09/2018	autumn
B	B3	13/09/2018	autumn
B	B3	13/09/2018	autumn
B	B3	13/09/2018	autumn
B	B3	13/09/2018	autumn
B	B3	13/09/2018	autumn
B	B3	13/09/2018	autumn
B	B3	13/09/2018	autumn
B	B3	13/09/2018	autumn
B	B3	13/09/2018	autumn
B	B4	13/09/2018	autumn
B	B4	13/09/2018	autumn
B	B4	13/09/2018	autumn
B	B4	13/09/2018	autumn
B	B4	13/09/2018	autumn
B	B4	13/09/2018	autumn
B	B4	13/09/2018	autumn
B	B4	13/09/2018	autumn
B	B4	13/09/2018	autumn
B	B4	13/09/2018	autumn
B	B4	13/09/2018	autumn
B	B4	13/09/2018	autumn
B	B4	13/09/2018	autumn
B	B4	13/09/2018	autumn
B	B4	13/09/2018	autumn
B	B4	13/09/2018	autumn
B	B4	13/09/2018	autumn
B	B4	13/09/2018	autumn
B	B4	13/09/2018	autumn
B	B4	13/09/2018	autumn
B	B4	13/09/2018	autumn
B	B4	13/09/2018	autumn
B	B4	13/09/2018	autumn
B	B4	13/09/2018	autumn
B	B4	13/09/2018	autumn
B	B4	13/09/2018	autumn
B	B4	13/09/2018	autumn
B	B4	13/09/2018	autumn
B	B4	13/09/2018	autumn
B	B4	13/09/2018	autumn
B	B4	13/09/2018	autumn
B	B4	13/09/2018	autumn
B	B4	13/09/2018	autumn
B	B4	13/09/2018	autumn
B	B4	13/09/2018	autumn
B	B4	13/09/2018	autumn
B	B4	13/09/2018	autumn
B	B4	13/09/2018	autumn
B	B5	13/09/2018	autumn
B	B5	13/09/2018	autumn
B	B5	13/09/2018	autumn
B	B5	13/09/2018	autumn
B	B5	13/09/2018	autumn
B	B5	13/09/2018	autumn
B	B5	13/09/2018	autumn
B	B5	13/09/2018	autumn
B	B5	13/09/2018	autumn
B	B5	13/09/2018	autumn
B	B5	13/09/2018	autumn
B	B5	13/09/2018	autumn
B	B5	13/09/2018	autumn
B	B5	13/09/2018	autumn
B	B5	13/09/2018	autumn
B	B5	13/09/2018	autumn
B	B5	13/09/2018	autumn
B	B5	13/09/2018	autumn
B	B5	13/09/2018	autumn
B	B5	13/09/2018	autumn
B	B5	13/09/2018	autumn
B	B5	13/09/2018	autumn
B	B5	13/09/2018	autumn
B	B5	13/09/2018	autumn
B	B5	13/09/2018	autumn
B	B5	13/09/2018	autumn
B	B5	13/09/2018	autumn
B	B5	13/09/2018	autumn
B	B5	13/09/2018	autumn
B	B5	13/09/2018	autumn
B	B5	13/09/2018	autumn
B	B5	13/09/2018	autumn
B	B5	13/09/2018	autumn
B	B5	13/09/2018	autumn
B	B5	13/09/2018	autumn
B	B5	13/09/2018	autumn
B	B5	13/09/2018	autumn
B	B5	13/09/2018	autumn
B	B5	13/09/2018	autumn
B	B5	13/09/2018	autumn
B	B5	13/09/2018	autumn
B	B5	13/09/2018	autumn
B	B5	13/09/2018	autumn
B	B5	13/09/2018	autumn
B	B5	13/09/2018	autumn
B	B5	13/09/2018	autumn
B	B5	13/09/2018	autumn
B	B5	13/09/2018	autumn
B	B5	13/09/2018	autumn
B	B5	13/09/2018	autumn
B	B5	13/09/2018	autumn
B	B5	13/09/2018	autumn
B	B5	13/09/2018	autumn
B	B5	13/09/2018	autumn
B	B5	13/09/2018	autumn
B	B5	13/09/2018	autumn
B	B5	13/09/2018	autumn
B	B5	13/09/2018	autumn
B	B5	13/09/2018	autumn
B	B5	13/09/2018	autumn
B	B5	13/09/2018	autumn
B	B5	13/09/2018	autumn
B	B5	13/09/2018	autumn
B	B5	13/09/2018	autumn
B	B5	13/09/2018	autumn
B	B5	13/09/2018	autumn
B	B5	13/09/2018	autumn
B	B5	13/09/2018	autumn
B	B5	13/09/2018	autumn
B	B5	13/09/2018	autumn
B	B5	13/09/2018	autumn
B	B5	13/09/2018	autumn
B	B6	13/09/2018	autumn
B	B6	13/09/2018	autumn
B	B6	13/09/2018	autumn
B	B6	13/09/2018	autumn
B	B6	13/09/2018	autumn
B	B6	13/09/2018	autumn
B	B6	13/09/2018	autumn
B	B6	13/09/2018	autumn
B	B6	13/09/2018	autumn
B	B6	13/09/2018	autumn
B	B6	13/09/2018	autumn
B	B6	13/09/2018	autumn
B	B6	13/09/2018	autumn
B	B6	13/09/2018	autumn
B	B6	13/09/2018	autumn
B	B6	13/09/2018	autumn
B	B6	13/09/2018	autumn
B	B6	13/09/2018	autumn
B	B6	13/09/2018	autumn
B	B6	13/09/2018	autumn
B	B6	13/09/2018	autumn
B	B6	13/09/2018	autumn
B	B6	13/09/2018	autumn
B	B6	13/09/2018	autumn
B	B6	13/09/2018	autumn
B	B6	13/09/2018	autumn
B	B6	13/09/2018	autumn
B	B6	13/09/2018	autumn
B	B6	13/09/2018	autumn
B	B6	13/09/2018	autumn
B	B6	13/09/2018	autumn
B	B6	13/09/2018	autumn
B	B6	13/09/2018	autumn
B	B6	13/09/2018	autumn
B	B6	13/09/2018	autumn
B	B6	13/09/2018	autumn
B	B6	13/09/2018	autumn
B	B6	13/09/2018	autumn
B	B6	13/09/2018	autumn
B	B6	13/09/2018	autumn
B	B6	13/09/2018	autumn
B	B6	13/09/2018	autumn
B	B6	13/09/2018	autumn
B	B6	13/09/2018	autumn
B	B6	13/09/2018	autumn
B	B6	13/09/2018	autumn
B	B6	13/09/2018	autumn
B	B6	13/09/2018	autumn
B	B6	13/09/2018	autumn
B	B6	13/09/2018	autumn
B	B6	13/09/2018	autumn
B	B6	13/09/2018	autumn
B	B6	13/09/2018	autumn
B	B6	13/09/2018	autumn
B	B6	13/09/2018	autumn
B	B6	13/09/2018	autumn
B	B6	13/09/2018	autumn
B	B6	13/09/2018	autumn
B	B6	13/09/2018	autumn
B	B6	13/09/2018	autumn
B	B6	13/09/2018	autumn
B	B6	13/09/2018	autumn
B	B6	13/09/2018	autumn
B	B6	13/09/2018	autumn
B	B6	13/09/2018	autumn
B	B6	13/09/2018	autumn
B	B6	13/09/2018	autumn
B	B6	13/09/2018	autumn
B	B6	13/09/2018	autumn
B	B6	13/09/2018	autumn
B	B6	13/09/2018	autumn
B	B6	13/09/2018	autumn
B	B6	13/09/2018	autumn
B	B6	13/09/2018	autumn
B	B6	13/09/2018	autumn
B	B6	13/09/2018	autumn
B	B6	13/09/2018	autumn
B	B6	13/09/2018	autumn
B	B6	13/09/2018	autumn
B	B6	13/09/2018	autumn
B	B6	13/09/2018	autumn
B	B6	13/09/2018	autumn
B	B6	13/09/2018	autumn
B	B6	13/09/2018	autumn
B	B6	13/09/2018	autumn
B	B7	13/09/2018	autumn
B	B7	13/09/2018	autumn
B	B7	13/09/2018	autumn
B	B7	13/09/2018	autumn
B	B7	13/09/2018	autumn
B	B7	13/09/2018	autumn
B	B7	13/09/2018	autumn
B	B7	13/09/2018	autumn
B	B7	13/09/2018	autumn
B	B7	13/09/2018	autumn
B	B7	13/09/2018	autumn
B	B7	13/09/2018	autumn
B	B7	13/09/2018	autumn
B	B7	13/09/2018	autumn
B	B7	13/09/2018	autumn
B	B7	13/09/2018	autumn
B	B7	13/09/2018	autumn
B	B7	13/09/2018	autumn
B	B7	13/09/2018	autumn
B	B7	13/09/2018	autumn
B	B7	13/09/2018	autumn
B	B7	13/09/2018	autumn
B	B7	13/09/2018	autumn
B	B7	13/09/2018	autumn
B	B7	13/09/2018	autumn
B	B7	13/09/2018	autumn
B	B7	13/09/2018	autumn
B	B7	13/09/2018	autumn
B	B7	13/09/2018	autumn
B	B7	13/09/2018	autumn
B	B7	13/09/2018	autumn
B	B7	13/09/2018	autumn
B	B7	13/09/2018	autumn
B	B7	13/09/2018	autumn
B	B7	13/09/2018	autumn
B	B7	13/09/2018	autumn
B	B7	13/09/2018	autumn
B	B7	13/09/2018	autumn
B	B7	13/09/2018	autumn
B	B7	13/09/2018	autumn
B	B7	13/09/2018	autumn
B	B7	13/09/2018	autumn
B	B7	13/09/2018	autumn
B	B7	13/09/2018	autumn
B	B7	13/09/2018	autumn
B	B7	13/09/2018	autumn
B	B7	13/09/2018	autumn
B	B7	13/09/2018	autumn
B	B7	13/09/2018	autumn
B	B7	13/09/2018	autumn
B	B7	13/09/2018	autumn
B	B7	13/09/2018	autumn
B	B7	13/09/2018	autumn
B	B7	13/09/2018	autumn
B	B7	13/09/2018	autumn
B	B7	13/09/2018	autumn
B	B7	13/09/2018	autumn
B	B7	13/09/2018	autumn
B	B7	13/09/2018	autumn
B	B7	13/09/2018	autumn
B	B7	13/09/2018	autumn
B	B7	13/09/2018	autumn
B	B7	13/09/2018	autumn
B	B7	13/09/2018	autumn
B	B7	13/09/2018	autumn
B	B7	13/09/2018	autumn
B	B7	13/09/2018	autumn
B	B7	13/09/2018	autumn
B	B7	13/09/2018	autumn
B	B7	13/09/2018	autumn
B	B7	13/09/2018	autumn
B	B7	13/09/2018	autumn
B	B7	13/09/2018	autumn
B	B7	13/09/2018	autumn
B	B7	13/09/2018	autumn
B	B7	13/09/2018	autumn
B	B7	13/09/2018	autumn
B	B7	13/09/2018	autumn
B	B7	13/09/2018	autumn
B	B7	13/09/2018	autumn
B	B7	13/09/2018	autumn
B	B7	13/09/2018	autumn
B	B7	13/09/2018	autumn
B	B7	13/09/2018	autumn
B	B1	09/04/2019	spring
B	B2	09/04/2019	spring
B	B3	09/04/2019	spring
B	B3	09/04/2019	spring
B	B3	09/04/2019	spring
B	B3	09/04/2019	spring
B	B4	09/04/2019	spring
B	B4	09/04/2019	spring
B	B4	09/04/2019	spring
B	B4	09/04/2019	spring
B	B4	09/04/2019	spring
B	B4	09/04/2019	spring
B	B4	09/04/2019	spring
B	B4	09/04/2019	spring
B	B4	09/04/2019	spring
B	B4	09/04/2019	spring
B	B4	09/04/2019	spring
B	B4	09/04/2019	spring
B	B4	09/04/2019	spring
B	B4	09/04/2019	spring
B	B4	09/04/2019	spring
B	B4	09/04/2019	spring
B	B4	09/04/2019	spring
B	B4	09/04/2019	spring
B	B4	09/04/2019	spring
B	B5	09/04/2019	spring
B	B6	09/04/2019	spring
B	B7	09/04/2019	spring
B	B1	22/05/2019	spring
B	B1	22/05/2019	spring
B	B1	22/05/2019	spring
B	B1	22/05/2019	spring
B	B1	22/05/2019	spring
B	B2	22/05/2019	spring
B	B2	22/05/2019	spring
B	B2	22/05/2019	spring
B	B2	22/05/2019	spring
B	B3	22/05/2019	spring
B	B3	22/05/2019	spring
B	B3	22/05/2019	spring
B	B3	22/05/2019	spring
B	B3	22/05/2019	spring
B	B3	22/05/2019	spring
B	B4	22/05/2019	spring
B	B4	22/05/2019	spring
B	B4	22/05/2019	spring
B	B4	22/05/2019	spring
B	B4	22/05/2019	spring
B	B4	22/05/2019	spring
B	B4	22/05/2019	spring
B	B4	22/05/2019	spring
B	B4	22/05/2019	spring
B	B4	22/05/2019	spring
B	B4	22/05/2019	spring
B	B5	22/05/2019	spring
B	B6	22/05/2019	spring
B	B7	22/05/2019	spring
B	B1	15/07/2019	summer
B	B2	15/07/2019	summer
B	B3	15/07/2019	summer
B	B4	15/07/2019	summer
B	B5	15/07/2019	summer
B	B6	15/07/2019	summer
B	B7	15/07/2019	summer
B	B7	15/07/2019	summer
B	B7	15/07/2019	summer
B	B7	15/07/2019	summer
B	B7	15/07/2019	summer
B	B7	15/07/2019	summer
B	B7	15/07/2019	summer
B	B7	15/07/2019	summer
B	B7	15/07/2019	summer
B	B7	15/07/2019	summer
B	B1	23/10/2019	autumn
B	B2	23/10/2019	autumn
B	B3	23/10/2019	autumn
B	B4	23/10/2019	autumn
B	B4	23/10/2019	autumn
B	B4	23/10/2019	autumn
B	B4	23/10/2019	autumn
B	B4	23/10/2019	autumn
B	B4	23/10/2019	autumn
B	B4	23/10/2019	autumn
B	B5	23/10/2019	autumn
B	B5	23/10/2019	autumn
B	B5	23/10/2019	autumn
B	B5	23/10/2019	autumn
B	B5	23/10/2019	autumn
B	B5	23/10/2019	autumn
B	B5	23/10/2019	autumn
B	B5	23/10/2019	autumn
B	B5	23/10/2019	autumn
B	B5	23/10/2019	autumn
B	B5	23/10/2019	autumn
B	B6	23/10/2019	autumn
B	B6	23/10/2019	autumn
B	B6	23/10/2019	autumn
B	B6	23/10/2019	autumn
B	B6	23/10/2019	autumn
B	B6	23/10/2019	autumn
B	B6	23/10/2019	autumn
B	B6	23/10/2019	autumn
B	B6	23/10/2019	autumn
B	B6	23/10/2019	autumn
B	B6	23/10/2019	autumn
B	B6	23/10/2019	autumn
B	B6	23/10/2019	autumn
B	B6	23/10/2019	autumn
B	B6	23/10/2019	autumn
B	B7	23/10/2019	autumn
B	B7	23/10/2019	autumn
B	B7	23/10/2019	autumn
B	B7	23/10/2019	autumn
B	B7	23/10/2019	autumn
B	B7	23/10/2019	autumn
B	B7	23/10/2019	autumn
B	B7	23/10/2019	autumn
B	B7	23/10/2019	autumn
B	B7	23/10/2019	autumn
B	B7	23/10/2019	autumn
B	B7	23/10/2019	autumn
B	B1	18/05/2020	spring
B	B1	18/05/2020	spring
B	B2	18/05/2020	spring
B	B2	18/05/2020	spring
B	B2	18/05/2020	spring
B	B3	18/05/2020	spring
B	B3	18/05/2020	spring
B	B4	19/05/2020	spring
B	B4	19/05/2020	spring
B	B4	19/05/2020	spring
B	B4	19/05/2020	spring
B	B4	19/05/2020	spring
B	B4	19/05/2020	spring
B	B5	19/05/2020	spring
B	B5	19/05/2020	spring
B	B5	19/05/2020	spring
B	B5	19/05/2020	spring
B	B5	19/05/2020	spring
B	B5	19/05/2020	spring
B	B5	19/05/2020	spring
B	B5	19/05/2020	spring
B	B5	19/05/2020	spring
B	B5	19/05/2020	spring
B	B6	19/05/2020	spring
B	B6	19/05/2020	spring
B	B6	19/05/2020	spring
B	B6	19/05/2020	spring
B	B6	19/05/2020	spring
B	B6	19/05/2020	spring
B	B6	19/05/2020	spring
B	B6	19/05/2020	spring
B	B6	19/05/2020	spring
B	B7	19/05/2020	spring
B	B7	19/05/2020	spring
B	B7	19/05/2020	spring
B	B7	19/05/2020	spring
B	B7	19/05/2020	spring
B	B7	19/05/2020	spring
B	B7	19/05/2020	spring
B	B7	19/05/2020	spring
B	B7	19/05/2020	spring
B	B7	19/05/2020	spring
B	B1	07/07/2020	summer
B	B1	07/07/2020	summer
B	B1	07/07/2020	summer
B	B1	07/07/2020	summer
B	B1	07/07/2020	summer
B	B1	07/07/2020	summer
B	B2	07/07/2020	summer
B	B2	07/07/2020	summer
B	B2	07/07/2020	summer
B	B2	07/07/2020	summer
B	B2	07/07/2020	summer
B	B3	07/07/2020	summer
B	B3	07/07/2020	summer
B	B3	07/07/2020	summer
B	B3	07/07/2020	summer
B	B3	07/07/2020	summer
B	B3	07/07/2020	summer
B	B4	08/07/2020	summer
B	B4	08/07/2020	summer
B	B4	08/07/2020	summer
B	B4	08/07/2020	summer
B	B4	08/07/2020	summer
B	B4	08/07/2020	summer
B	B4	08/07/2020	summer
B	B4	08/07/2020	summer
B	B4	08/07/2020	summer
B	B5	08/07/2020	summer
B	B5	08/07/2020	summer
B	B5	08/07/2020	summer
B	B5	08/07/2020	summer
B	B5	08/07/2020	summer
B	B5	08/07/2020	summer
B	B5	08/07/2020	summer
B	B5	08/07/2020	summer
B	B5	08/07/2020	summer
B	B5	08/07/2020	summer
B	B5	08/07/2020	summer
B	B5	08/07/2020	summer
B	B5	08/07/2020	summer
B	B5	08/07/2020	summer
B	B6	08/07/2020	summer
B	B6	08/07/2020	summer
B	B6	08/07/2020	summer
B	B6	08/07/2020	summer
B	B6	08/07/2020	summer
B	B6	08/07/2020	summer
B	B6	08/07/2020	summer
B	B6	08/07/2020	summer
B	B6	08/07/2020	summer
B	B6	08/07/2020	summer
B	B6	08/07/2020	summer
B	B6	08/07/2020	summer
B	B6	08/07/2020	summer
B	B6	08/07/2020	summer
B	B6	08/07/2020	summer
B	B7	08/07/2020	summer
B	B7	08/07/2020	summer
B	B7	08/07/2020	summer
B	B7	08/07/2020	summer
B	B7	08/07/2020	summer
B	B7	08/07/2020	summer
B	B7	08/07/2020	summer
B	B7	08/07/2020	summer
B	B7	08/07/2020	summer
B	B7	08/07/2020	summer
B	B7	08/07/2020	summer
B	B7	08/07/2020	summer
B	B7	08/07/2020	summer
B	B7	08/07/2020	summer
B	B7	08/07/2020	summer
B	B1	21/09/2020	autumn
B	B1	21/09/2020	autumn
B	B1	21/09/2020	autumn
B	B1	21/09/2020	autumn
B	B1	21/09/2020	autumn
B	B1	21/09/2020	autumn
B	B1	21/09/2020	autumn
B	B1	21/09/2020	autumn
B	B1	21/09/2020	autumn
B	B2	21/09/2020	autumn
B	B3	21/09/2020	autumn
B	B3	21/09/2020	autumn
B	B3	21/09/2020	autumn
B	B3	21/09/2020	autumn
B	B3	21/09/2020	autumn
B	B3	21/09/2020	autumn
B	B3	21/09/2020	autumn
B	B3	21/09/2020	autumn
B	B3	21/09/2020	autumn
B	B3	21/09/2020	autumn
B	B3	21/09/2020	autumn
B	B3	21/09/2020	autumn
B	B4	21/09/2020	autumn
B	B5	21/09/2020	autumn
B	B5	21/09/2020	autumn
B	B5	21/09/2020	autumn
B	B5	21/09/2020	autumn
B	B5	21/09/2020	autumn
B	B5	21/09/2020	autumn
B	B5	21/09/2020	autumn
B	B5	21/09/2020	autumn
B	B5	21/09/2020	autumn
B	B5	21/09/2020	autumn
B	B5	21/09/2020	autumn
B	B5	21/09/2020	autumn
B	B5	21/09/2020	autumn
B	B5	21/09/2020	autumn
B	B5	21/09/2020	autumn
B	B5	21/09/2020	autumn
B	B5	21/09/2020	autumn
B	B5	21/09/2020	autumn
B	B5	21/09/2020	autumn
B	B5	21/09/2020	autumn
B	B5	21/09/2020	autumn
B	B5	21/09/2020	autumn
B	B5	21/09/2020	autumn
B	B5	21/09/2020	autumn
B	B5	21/09/2020	autumn
B	B5	21/09/2020	autumn
B	B5	21/09/2020	autumn
B	B5	21/09/2020	autumn
B	B5	21/09/2020	autumn
B	B5	21/09/2020	autumn
B	B5	21/09/2020	autumn
B	B5	21/09/2020	autumn
B	B5	21/09/2020	autumn
B	B5	21/09/2020	autumn
B	B5	21/09/2020	autumn
B	B6	21/09/2020	autumn
B	B6	21/09/2020	autumn
B	B6	21/09/2020	autumn
B	B6	21/09/2020	autumn
B	B6	21/09/2020	autumn
B	B6	21/09/2020	autumn
B	B6	21/09/2020	autumn
B	B6	21/09/2020	autumn
B	B6	21/09/2020	autumn
B	B6	21/09/2020	autumn
B	B6	21/09/2020	autumn
B	B6	21/09/2020	autumn
B	B6	21/09/2020	autumn
B	B6	21/09/2020	autumn
B	B6	21/09/2020	autumn
B	B6	21/09/2020	autumn
B	B6	21/09/2020	autumn
B	B6	21/09/2020	autumn
B	B6	21/09/2020	autumn
B	B6	21/09/2020	autumn
B	B6	21/09/2020	autumn
B	B6	21/09/2020	autumn
B	B6	21/09/2020	autumn
B	B6	21/09/2020	autumn
B	B6	21/09/2020	autumn
B	B6	21/09/2020	autumn
B	B6	21/09/2020	autumn
B	B6	21/09/2020	autumn
B	B6	21/09/2020	autumn
B	B6	21/09/2020	autumn
B	B6	21/09/2020	autumn
B	B6	21/09/2020	autumn
B	B6	21/09/2020	autumn
B	B6	21/09/2020	autumn
B	B6	21/09/2020	autumn
B	B6	21/09/2020	autumn
B	B6	21/09/2020	autumn
B	B6	21/09/2020	autumn
B	B6	21/09/2020	autumn
B	B6	21/09/2020	autumn
B	B6	21/09/2020	autumn
B	B6	21/09/2020	autumn
B	B6	21/09/2020	autumn
B	B6	21/09/2020	autumn
B	B6	21/09/2020	autumn
B	B6	21/09/2020	autumn
B	B6	21/09/2020	autumn
B	B6	21/09/2020	autumn
B	B6	21/09/2020	autumn
B	B6	21/09/2020	autumn
B	B6	21/09/2020	autumn
B	B6	21/09/2020	autumn
B	B6	21/09/2020	autumn
B	B6	21/09/2020	autumn
B	B6	21/09/2020	autumn
B	B3	22/03/2021	spring
B	B3	22/03/2021	spring
B	B3	22/03/2021	spring
B	B3	22/03/2021	spring
B	B3	22/03/2021	spring
B	B3	22/03/2021	spring
B	B3	22/03/2021	spring
B	B3	22/03/2021	spring
B	B4	22/03/2021	spring
B	B4	22/03/2021	spring
B	B4	22/03/2021	spring
B	B4	22/03/2021	spring
B	B4	22/03/2021	spring
B	B4	22/03/2021	spring
B	B4	22/03/2021	spring
B	B4	22/03/2021	spring
B	B4	22/03/2021	spring
B	B4	22/03/2021	spring
B	B4	22/03/2021	spring
B	B4	22/03/2021	spring
B	B4	22/03/2021	spring
B	B4	22/03/2021	spring
B	B4	22/03/2021	spring
B	B4	22/03/2021	spring
B	B4	22/03/2021	spring
B	B4	22/03/2021	spring
B	B4	22/03/2021	spring
B	B4	22/03/2021	spring
B	B4	22/03/2021	spring
B	B4	22/03/2021	spring
B	B4	22/03/2021	spring
B	B4	22/03/2021	spring
B	B4	22/03/2021	spring
B	B5	22/03/2021	spring
B	B5	22/03/2021	spring
B	B5	22/03/2021	spring
B	B5	22/03/2021	spring
B	B5	22/03/2021	spring
B	B5	22/03/2021	spring
B	B5	22/03/2021	spring
B	B5	22/03/2021	spring
B	B5	22/03/2021	spring
B	B5	22/03/2021	spring
B	B5	22/03/2021	spring
B	B5	22/03/2021	spring
B	B5	22/03/2021	spring
B	B5	22/03/2021	spring
B	B5	22/03/2021	spring
B	B5	22/03/2021	spring
B	B5	22/03/2021	spring
B	B5	22/03/2021	spring
B	B5	22/03/2021	spring
B	B5	22/03/2021	spring
B	B5	22/03/2021	spring
B	B5	22/03/2021	spring
B	B5	22/03/2021	spring
B	B5	22/03/2021	spring
B	B5	22/03/2021	spring
B	B5	22/03/2021	spring
B	B5	22/03/2021	spring
B	B5	22/03/2021	spring
B	B5	22/03/2021	spring
B	B5	22/03/2021	spring
B	B5	22/03/2021	spring
B	B5	22/03/2021	spring
B	B5	22/03/2021	spring
B	B5	22/03/2021	spring
B	B5	22/03/2021	spring
B	B5	22/03/2021	spring
B	B5	22/03/2021	spring
B	B5	22/03/2021	spring
B	B5	22/03/2021	spring
B	B5	22/03/2021	spring
B	B5	22/03/2021	spring
B	B5	22/03/2021	spring
B	B5	22/03/2021	spring
B	B5	22/03/2021	spring
B	B5	22/03/2021	spring
B	B5	22/03/2021	spring
B	B5	22/03/2021	spring
B	B5	22/03/2021	spring
B	B5	22/03/2021	spring
B	B5	22/03/2021	spring
B	B6	22/03/2021	spring
B	B6	22/03/2021	spring
B	B6	22/03/2021	spring
B	B6	22/03/2021	spring
B	B6	22/03/2021	spring
B	B6	22/03/2021	spring
B	B6	22/03/2021	spring
B	B6	22/03/2021	spring
B	B6	22/03/2021	spring
B	B6	22/03/2021	spring
B	B6	22/03/2021	spring
B	B6	22/03/2021	spring
B	B6	22/03/2021	spring
B	B6	22/03/2021	spring
B	B6	22/03/2021	spring
B	B6	22/03/2021	spring
B	B6	22/03/2021	spring
B	B6	22/03/2021	spring
B	B6	22/03/2021	spring
B	B6	22/03/2021	spring
B	B6	22/03/2021	spring
B	B6	22/03/2021	spring
B	B6	22/03/2021	spring
B	B6	22/03/2021	spring
B	B6	22/03/2021	spring
B	B6	22/03/2021	spring
B	B6	22/03/2021	spring
B	B6	22/03/2021	spring
B	B6	22/03/2021	spring
B	B6	22/03/2021	spring
B	B6	22/03/2021	spring
B	B6	22/03/2021	spring
B	B6	22/03/2021	spring
B	B6	22/03/2021	spring
B	B6	22/03/2021	spring
B	B6	22/03/2021	spring
B	B6	22/03/2021	spring
B	B6	22/03/2021	spring
B	B6	22/03/2021	spring
B	B6	22/03/2021	spring
B	B6	22/03/2021	spring
B	B6	22/03/2021	spring
B	B6	22/03/2021	spring
B	B6	22/03/2021	spring
B	B6	22/03/2021	spring
B	B6	22/03/2021	spring
B	B6	22/03/2021	spring
B	B6	22/03/2021	spring
B	B6	22/03/2021	spring
B	B6	22/03/2021	spring
B	B6	22/03/2021	spring
B	B6	22/03/2021	spring
B	B6	22/03/2021	spring
B	B6	22/03/2021	spring
B	B6	22/03/2021	spring
B	B7	22/03/2021	spring
B	B7	22/03/2021	spring
B	B7	22/03/2021	spring
B	B7	22/03/2021	spring
B	B7	22/03/2021	spring
B	B7	22/03/2021	spring
B	B7	22/03/2021	spring
B	B7	22/03/2021	spring
B	B7	22/03/2021	spring
B	B7	22/03/2021	spring
B	B7	22/03/2021	spring
B	B7	22/03/2021	spring
B	B7	22/03/2021	spring
B	B7	22/03/2021	spring
B	B7	22/03/2021	spring
B	B7	22/03/2021	spring
B	B7	22/03/2021	spring
B	B7	22/03/2021	spring
B	B7	22/03/2021	spring
B	B7	22/03/2021	spring
B	B7	22/03/2021	spring
B	B7	22/03/2021	spring
B	B7	22/03/2021	spring
B	B7	22/03/2021	spring
B	B7	22/03/2021	spring
B	B7	22/03/2021	spring
B	B7	22/03/2021	spring
B	B7	22/03/2021	spring
B	B7	22/03/2021	spring
B	B7	22/03/2021	spring
B	B7	22/03/2021	spring
B	B7	22/03/2021	spring
B	B7	22/03/2021	spring
B	B7	22/03/2021	spring
B	B7	22/03/2021	spring
B	B7	22/03/2021	spring
B	B7	22/03/2021	spring
B	B7	22/03/2021	spring
B	B7	22/03/2021	spring
B	B7	22/03/2021	spring
B	B7	22/03/2021	spring
B	B7	22/03/2021	spring
B	B7	22/03/2021	spring
B	B7	22/03/2021	spring
B	B7	22/03/2021	spring
B	B7	22/03/2021	spring
B	B7	22/03/2021	spring
B	B7	22/03/2021	spring
B	B7	22/03/2021	spring
B	B7	22/03/2021	spring
B	B7	22/03/2021	spring
B	B7	22/03/2021	spring
B	B7	22/03/2021	spring
B	B7	22/03/2021	spring
B	B7	22/03/2021	spring
B	B7	22/03/2021	spring
B	B7	22/03/2021	spring
B	B2	23/03/2021	spring
B	B2	23/03/2021	spring
B	B2	23/03/2021	spring
B	B2	23/03/2021	spring
B	B2	23/03/2021	spring
B	B2	23/03/2021	spring
B	B2	23/03/2021	spring
B	B2	23/03/2021	spring
B	B2	23/03/2021	spring
B	B2	23/03/2021	spring
B	B2	23/03/2021	spring
B	B2	23/03/2021	spring
B	B2	23/03/2021	spring
B	B2	23/03/2021	spring
B	B2	23/03/2021	spring
B	B2	23/03/2021	spring
B	B2	23/03/2021	spring
B	B2	23/03/2021	spring
B	B2	23/03/2021	spring
B	B1	24/03/2021	spring
B	B1	24/03/2021	spring
B	B1	24/03/2021	spring
B	B3	31/05/2021	spring
B	B3	31/05/2021	spring
B	B3	31/05/2021	spring
B	B4	31/05/2021	spring
B	B4	31/05/2021	spring
B	B4	31/05/2021	spring
B	B4	31/05/2021	spring
B	B4	31/05/2021	spring
B	B4	31/05/2021	spring
B	B5	31/05/2021	spring
B	B5	31/05/2021	spring
B	B5	31/05/2021	spring
B	B5	31/05/2021	spring
B	B5	31/05/2021	spring
B	B5	31/05/2021	spring
B	B5	31/05/2021	spring
B	B5	31/05/2021	spring
B	B5	31/05/2021	spring
B	B5	31/05/2021	spring
B	B5	31/05/2021	spring
B	B5	31/05/2021	spring
B	B6	31/05/2021	spring
B	B6	31/05/2021	spring
B	B6	31/05/2021	spring
B	B6	31/05/2021	spring
B	B6	31/05/2021	spring
B	B6	31/05/2021	spring
B	B6	31/05/2021	spring
B	B6	31/05/2021	spring
B	B6	31/05/2021	spring
B	B6	31/05/2021	spring
B	B6	31/05/2021	spring
B	B6	31/05/2021	spring
B	B6	31/05/2021	spring
B	B6	31/05/2021	spring
B	B7	31/05/2021	spring
B	B7	31/05/2021	spring
B	B7	31/05/2021	spring
B	B7	31/05/2021	spring
B	B7	31/05/2021	spring
B	B7	31/05/2021	spring
B	B7	31/05/2021	spring
B	B7	31/05/2021	spring
B	B7	31/05/2021	spring
B	B7	31/05/2021	spring
B	B7	31/05/2021	spring
B	B7	31/05/2021	spring
B	B7	31/05/2021	spring
B	B1	01/06/2021	summer
B	B1	01/06/2021	summer
B	B1	01/06/2021	summer
B	B1	01/06/2021	summer
B	B1	01/06/2021	summer
B	B2	01/06/2021	summer
B	B2	01/06/2021	summer
B	B2	01/06/2021	summer
B	B2	01/06/2021	summer
B	B2	01/06/2021	summer
B	B3	01/07/2021	summer
B	B3	01/07/2021	summer
B	B3	01/07/2021	summer
B	B4	01/07/2021	summer
B	B4	01/07/2021	summer
B	B4	01/07/2021	summer
B	B4	01/07/2021	summer
B	B4	01/07/2021	summer
B	B4	01/07/2021	summer
B	B4	01/07/2021	summer
B	B5	01/07/2021	summer
B	B5	01/07/2021	summer
B	B5	01/07/2021	summer
B	B5	01/07/2021	summer
B	B5	01/07/2021	summer
B	B5	01/07/2021	summer
B	B5	01/07/2021	summer
B	B5	01/07/2021	summer
B	B5	01/07/2021	summer
B	B5	01/07/2021	summer
B	B5	01/07/2021	summer
B	B5	01/07/2021	summer
B	B6	01/07/2021	summer
B	B6	01/07/2021	summer
B	B6	01/07/2021	summer
B	B6	01/07/2021	summer
B	B6	01/07/2021	summer
B	B6	01/07/2021	summer
B	B6	01/07/2021	summer
B	B6	01/07/2021	summer
B	B6	01/07/2021	summer
B	B6	01/07/2021	summer
B	B6	01/07/2021	summer
B	B6	01/07/2021	summer
B	B6	01/07/2021	summer
B	B7	01/07/2021	summer
B	B7	01/07/2021	summer
B	B7	01/07/2021	summer
B	B7	01/07/2021	summer
B	B7	01/07/2021	summer
B	B7	01/07/2021	summer
B	B7	01/07/2021	summer
B	B7	01/07/2021	summer
B	B7	01/07/2021	summer
B	B7	01/07/2021	summer
B	B7	01/07/2021	summer
B	B7	01/07/2021	summer
B	B1	02/07/2021	summer
B	B1	02/07/2021	summer
B	B1	02/07/2021	summer
B	B1	02/07/2021	summer
B	B1	02/07/2021	summer
B	B1	02/07/2021	summer
B	B1	02/07/2021	summer
B	B1	02/07/2021	summer
B	B1	02/07/2021	summer
B	B1	02/07/2021	summer
B	B1	02/07/2021	summer
B	B1	02/07/2021	summer
B	B2	02/07/2021	summer
B	B2	02/07/2021	summer
B	B2	02/07/2021	summer
B	B2	02/07/2021	summer
B	B2	02/07/2021	summer
B	B2	02/07/2021	summer
B	B2	02/07/2021	summer
B	B2	02/07/2021	summer
B	B2	02/07/2021	summer
B	B2	02/07/2021	summer
B	B2	02/07/2021	summer
B	B2	02/07/2021	summer
B	B2	02/07/2021	summer
B	B1	03/10/2021	autumn
B	B2	03/10/2021	autumn
B	B3	03/10/2021	autumn
B	B4	03/10/2021	autumn
B	B5	03/10/2021	autumn
B	B6	03/10/2021	autumn
B	B7	03/10/2021	autumn
B	B3	24/03/2022	spring
B	B3	24/03/2022	spring
B	B3	24/03/2022	spring
B	B3	24/03/2022	spring
B	B4	24/03/2022	spring
B	B4	24/03/2022	spring
B	B4	24/03/2022	spring
B	B4	24/03/2022	spring
B	B4	24/03/2022	spring
B	B4	24/03/2022	spring
B	B4	24/03/2022	spring
B	B4	24/03/2022	spring
B	B4	24/03/2022	spring
B	B5	24/03/2022	spring
B	B5	24/03/2022	spring
B	B5	24/03/2022	spring
B	B5	24/03/2022	spring
B	B5	24/03/2022	spring
B	B5	24/03/2022	spring
B	B5	24/03/2022	spring
B	B5	24/03/2022	spring
B	B5	24/03/2022	spring
B	B5	24/03/2022	spring
B	B5	24/03/2022	spring
B	B5	24/03/2022	spring
B	B5	24/03/2022	spring
B	B5	24/03/2022	spring
B	B5	24/03/2022	spring
B	B5	24/03/2022	spring
B	B6	24/03/2022	spring
B	B6	24/03/2022	spring
B	B6	24/03/2022	spring
B	B6	24/03/2022	spring
B	B6	24/03/2022	spring
B	B6	24/03/2022	spring
B	B6	24/03/2022	spring
B	B6	24/03/2022	spring
B	B6	24/03/2022	spring
B	B6	24/03/2022	spring
B	B6	24/03/2022	spring
B	B6	24/03/2022	spring
B	B6	24/03/2022	spring
B	B6	24/03/2022	spring
B	B6	24/03/2022	spring
B	B6	24/03/2022	spring
B	B6	24/03/2022	spring
B	B6	24/03/2022	spring
B	B7	24/03/2022	spring
B	B7	24/03/2022	spring
B	B7	24/03/2022	spring
B	B7	24/03/2022	spring
B	B7	24/03/2022	spring
B	B7	24/03/2022	spring
B	B7	24/03/2022	spring
B	B7	24/03/2022	spring
B	B7	24/03/2022	spring
B	B7	24/03/2022	spring
B	B7	24/03/2022	spring
B	B7	24/03/2022	spring
B	B7	24/03/2022	spring
B	B7	24/03/2022	spring
B	B7	24/03/2022	spring
B	B7	24/03/2022	spring
B	B7	24/03/2022	spring
B	B7	24/03/2022	spring
B	B1	25/03/2022	spring
B	B1	25/03/2022	spring
B	B1	25/03/2022	spring
B	B1	25/03/2022	spring
B	B1	25/03/2022	spring
B	B1	25/03/2022	spring
B	B1	25/03/2022	spring
B	B1	25/03/2022	spring
B	B1	25/03/2022	spring
B	B1	25/03/2022	spring
B	B1	25/03/2022	spring
B	B1	25/03/2022	spring
B	B1	25/03/2022	spring
B	B1	25/03/2022	spring
B	B1	25/03/2022	spring
B	B1	25/03/2022	spring
B	B1	25/03/2022	spring
B	B1	25/03/2022	spring
B	B1	25/03/2022	spring
B	B1	25/03/2022	spring
B	B2	25/03/2022	spring
B	B2	25/03/2022	spring
B	B2	25/03/2022	spring
B	B2	25/03/2022	spring
B	B2	25/03/2022	spring
B	B2	25/03/2022	spring
B	B2	25/03/2022	spring
B	B2	25/03/2022	spring
B	B2	25/03/2022	spring
B	B2	25/03/2022	spring
B	B2	25/03/2022	spring
B	B2	25/03/2022	spring
B	B2	25/03/2022	spring
B	B2	25/03/2022	spring
B	B2	25/03/2022	spring
B	B2	25/03/2022	spring
B	B2	25/03/2022	spring
B	B2	25/03/2022	spring
B	B2	25/03/2022	spring
B	B2	25/03/2022	spring
B	B2	25/03/2022	spring
B	B3	04/05/2022	spring
B	B3	04/05/2022	spring
B	B3	04/05/2022	spring
B	B3	04/05/2022	spring
B	B4	04/05/2022	spring
B	B4	04/05/2022	spring
B	B4	04/05/2022	spring
B	B4	04/05/2022	spring
B	B4	04/05/2022	spring
B	B4	04/05/2022	spring
B	B4	04/05/2022	spring
B	B4	04/05/2022	spring
B	B4	04/05/2022	spring
B	B5	04/05/2022	spring
B	B5	04/05/2022	spring
B	B5	04/05/2022	spring
B	B5	04/05/2022	spring
B	B5	04/05/2022	spring
B	B5	04/05/2022	spring
B	B5	04/05/2022	spring
B	B5	04/05/2022	spring
B	B5	04/05/2022	spring
B	B5	04/05/2022	spring
B	B5	04/05/2022	spring
B	B5	04/05/2022	spring
B	B5	04/05/2022	spring
B	B5	04/05/2022	spring
B	B6	04/05/2022	spring
B	B6	04/05/2022	spring
B	B6	04/05/2022	spring
B	B6	04/05/2022	spring
B	B6	04/05/2022	spring
B	B6	04/05/2022	spring
B	B6	04/05/2022	spring
B	B6	04/05/2022	spring
B	B6	04/05/2022	spring
B	B6	04/05/2022	spring
B	B6	04/05/2022	spring
B	B6	04/05/2022	spring
B	B6	04/05/2022	spring
B	B6	04/05/2022	spring
B	B6	04/05/2022	spring
B	B7	04/05/2022	spring
B	B7	04/05/2022	spring
B	B7	04/05/2022	spring
B	B7	04/05/2022	spring
B	B7	04/05/2022	spring
B	B7	04/05/2022	spring
B	B7	04/05/2022	spring
B	B7	04/05/2022	spring
B	B7	04/05/2022	spring
B	B7	04/05/2022	spring
B	B7	04/05/2022	spring
B	B7	04/05/2022	spring
B	B7	04/05/2022	spring
B	B7	04/05/2022	spring
B	B7	04/05/2022	spring
B	B1	05/05/2022	spring
B	B1	05/05/2022	spring
B	B1	05/05/2022	spring
B	B1	05/05/2022	spring
B	B1	05/05/2022	spring
B	B2	05/05/2022	spring
B	B2	05/05/2022	spring
B	B2	05/05/2022	spring
B	B2	05/05/2022	spring
B	B3	04/07/2022	summer
B	B3	04/07/2022	summer
B	B3	04/07/2022	summer
B	B4	04/07/2022	summer
B	B4	04/07/2022	summer
B	B4	04/07/2022	summer
B	B4	04/07/2022	summer
B	B4	04/07/2022	summer
B	B1	05/07/2022	summer
B	B1	05/07/2022	summer
B	B1	05/07/2022	summer
B	B1	05/07/2022	summer
B	B1	05/07/2022	summer
B	B1	05/07/2022	summer
B	B2	05/07/2022	summer
B	B2	05/07/2022	summer
B	B2	05/07/2022	summer
B	B5	05/07/2022	summer
B	B6	05/07/2022	summer
B	B6	05/07/2022	summer
B	B6	05/07/2022	summer
B	B6	05/07/2022	summer
B	B6	05/07/2022	summer
B	B6	05/07/2022	summer
B	B6	05/07/2022	summer
B	B6	05/07/2022	summer
B	B6	05/07/2022	summer
B	B7	05/07/2022	summer
B	B7	05/07/2022	summer
B	B7	05/07/2022	summer
B	B7	05/07/2022	summer
B	B7	05/07/2022	summer
B	B7	05/07/2022	summer
B	B7	05/07/2022	summer
B	B7	05/07/2022	summer
B	B7	05/07/2022	summer
B	B7	05/07/2022	summer
B	B1	09/10/2022	autumn
B	B2	09/10/2022	autumn
B	B3	09/10/2022	autumn
B	B4	09/10/2022	autumn
B	B5	09/10/2022	autumn
B	B6	09/10/2022	autumn
B	B7	09/10/2022	autumn
D	D5	05/05/2011	spring
D	D6	05/05/2011	spring
D	D1	25/05/2011	spring
D	D2	25/05/2011	spring
D	D3	25/05/2011	spring
D	D4	25/05/2011	spring
D	D1	12/07/2011	summer
D	D2	12/07/2011	summer
D	D3	12/07/2011	summer
D	D4	12/07/2011	summer
D	D5	12/07/2011	summer
D	D6	12/07/2011	summer
D	D1	14/10/2011	autumn
D	D2	14/10/2011	autumn
D	D3	14/10/2011	autumn
D	D4	14/10/2011	autumn
D	D5	14/10/2011	autumn
D	D6	14/10/2011	autumn
D	D1	03/05/2012	spring
D	D2	03/05/2012	spring
D	D3	03/05/2012	spring
D	D4	03/05/2012	spring
D	D5	03/05/2012	spring
D	D6	03/05/2012	spring
D	D1	15/05/2013	spring
D	D2	15/05/2013	spring
D	D3	15/05/2013	spring
D	D4	15/05/2013	spring
D	D5	15/05/2013	spring
D	D6	15/05/2013	spring
D	D2	04/07/2013	summer
D	D3	04/07/2013	summer
D	D4	04/07/2013	summer
D	D5	04/07/2013	summer
D	D6	04/07/2013	summer
D	D1	05/07/2013	summer
D	D2	07/10/2013	autumn
D	D3	07/10/2013	autumn
D	D4	07/10/2013	autumn
D	D4	09/07/2015	summer
D	D5	09/07/2015	summer
D	D6	09/07/2015	summer
D	D1	10/07/2015	summer
D	D2	10/07/2015	summer
D	D3	10/07/2015	summer
D	D1	07/10/2015	autumn
D	D2	07/10/2015	autumn
D	D3	08/10/2015	autumn
D	D4	08/10/2015	autumn
D	D5	08/10/2015	autumn
D	D6	08/10/2015	autumn
D	D4	22/04/2016	spring
D	D4	22/04/2016	spring
D	D4	22/04/2016	spring
D	D4	22/04/2016	spring
D	D4	22/04/2016	spring
D	D4	22/04/2016	spring
D	D4	22/04/2016	spring
D	D4	22/04/2016	spring
D	D4	22/04/2016	spring
D	D4	22/04/2016	spring
D	D4	22/04/2016	spring
D	D4	22/04/2016	spring
D	D4	22/04/2016	spring
D	D4	22/04/2016	spring
D	D4	22/04/2016	spring
D	D4	22/04/2016	spring
D	D4	22/04/2016	spring
D	D4	22/04/2016	spring
D	D4	22/04/2016	spring
D	D4	22/04/2016	spring
D	D4	22/04/2016	spring
D	D4	22/04/2016	spring
D	D4	22/04/2016	spring
D	D4	22/04/2016	spring
D	D4	22/04/2016	spring
D	D4	22/04/2016	spring
D	D4	22/04/2016	spring
D	D4	22/04/2016	spring
D	D4	22/04/2016	spring
D	D4	22/04/2016	spring
D	D4	22/04/2016	spring
D	D4	22/04/2016	spring
D	D4	22/04/2016	spring
D	D4	22/04/2016	spring
D	D4	22/04/2016	spring
D	D4	22/04/2016	spring
D	D4	22/04/2016	spring
D	D4	22/04/2016	spring
D	D4	22/04/2016	spring
D	D4	22/04/2016	spring
D	D4	22/04/2016	spring
D	D4	22/04/2016	spring
D	D4	22/04/2016	spring
D	D4	22/04/2016	spring
D	D4	22/04/2016	spring
D	D4	22/04/2016	spring
D	D4	22/04/2016	spring
D	D4	22/04/2016	spring
D	D4	22/04/2016	spring
D	D4	22/04/2016	spring
D	D5	22/04/2016	spring
D	D5	22/04/2016	spring
D	D5	22/04/2016	spring
D	D5	22/04/2016	spring
D	D5	22/04/2016	spring
D	D5	22/04/2016	spring
D	D5	22/04/2016	spring
D	D5	22/04/2016	spring
D	D5	22/04/2016	spring
D	D5	22/04/2016	spring
D	D5	22/04/2016	spring
D	D5	22/04/2016	spring
D	D5	22/04/2016	spring
D	D5	22/04/2016	spring
D	D5	22/04/2016	spring
D	D5	22/04/2016	spring
D	D5	22/04/2016	spring
D	D5	22/04/2016	spring
D	D5	22/04/2016	spring
D	D5	22/04/2016	spring
D	D5	22/04/2016	spring
D	D5	22/04/2016	spring
D	D5	22/04/2016	spring
D	D5	22/04/2016	spring
D	D5	22/04/2016	spring
D	D5	22/04/2016	spring
D	D5	22/04/2016	spring
D	D5	22/04/2016	spring
D	D5	22/04/2016	spring
D	D5	22/04/2016	spring
D	D5	22/04/2016	spring
D	D5	22/04/2016	spring
D	D5	22/04/2016	spring
D	D5	22/04/2016	spring
D	D5	22/04/2016	spring
D	D5	22/04/2016	spring
D	D5	22/04/2016	spring
D	D5	22/04/2016	spring
D	D5	22/04/2016	spring
D	D5	22/04/2016	spring
D	D5	22/04/2016	spring
D	D5	22/04/2016	spring
D	D5	22/04/2016	spring
D	D5	22/04/2016	spring
D	D5	22/04/2016	spring
D	D5	22/04/2016	spring
D	D5	22/04/2016	spring
D	D5	22/04/2016	spring
D	D5	22/04/2016	spring
D	D5	22/04/2016	spring
D	D5	22/04/2016	spring
D	D5	22/04/2016	spring
D	D5	22/04/2016	spring
D	D5	22/04/2016	spring
D	D5	22/04/2016	spring
D	D5	22/04/2016	spring
D	D5	22/04/2016	spring
D	D5	22/04/2016	spring
D	D6	22/04/2016	spring
D	D6	22/04/2016	spring
D	D6	22/04/2016	spring
D	D6	22/04/2016	spring
D	D6	22/04/2016	spring
D	D6	22/04/2016	spring
D	D6	22/04/2016	spring
D	D6	22/04/2016	spring
D	D6	22/04/2016	spring
D	D6	22/04/2016	spring
D	D6	22/04/2016	spring
D	D1	25/04/2016	spring
D	D1	25/04/2016	spring
D	D1	25/04/2016	spring
D	D2	25/04/2016	spring
D	D2	25/04/2016	spring
D	D2	25/04/2016	spring
D	D2	25/04/2016	spring
D	D2	25/04/2016	spring
D	D2	25/04/2016	spring
D	D2	25/04/2016	spring
D	D2	25/04/2016	spring
D	D2	25/04/2016	spring
D	D2	25/04/2016	spring
D	D2	25/04/2016	spring
D	D2	25/04/2016	spring
D	D2	25/04/2016	spring
D	D2	25/04/2016	spring
D	D2	25/04/2016	spring
D	D2	25/04/2016	spring
D	D2	25/04/2016	spring
D	D2	25/04/2016	spring
D	D2	25/04/2016	spring
D	D2	25/04/2016	spring
D	D2	25/04/2016	spring
D	D2	25/04/2016	spring
D	D2	25/04/2016	spring
D	D2	25/04/2016	spring
D	D3	25/04/2016	spring
D	D3	25/04/2016	spring
D	D3	25/04/2016	spring
D	D3	25/04/2016	spring
D	D3	25/04/2016	spring
D	D3	25/04/2016	spring
D	D3	25/04/2016	spring
D	D3	25/04/2016	spring
D	D3	25/04/2016	spring
D	D3	25/04/2016	spring
D	D3	25/04/2016	spring
D	D3	25/04/2016	spring
D	D3	25/04/2016	spring
D	D3	25/04/2016	spring
D	D3	25/04/2016	spring
D	D3	25/04/2016	spring
D	D3	25/04/2016	spring
D	D3	25/04/2016	spring
D	D3	25/04/2016	spring
D	D3	25/04/2016	spring
D	D3	25/04/2016	spring
D	D3	25/04/2016	spring
D	D3	25/04/2016	spring
D	D3	25/04/2016	spring
D	D3	25/04/2016	spring
D	D3	25/04/2016	spring
D	D3	25/04/2016	spring
D	D3	25/04/2016	spring
D	D3	25/04/2016	spring
D	D3	25/04/2016	spring
D	D3	25/04/2016	spring
D	D3	25/04/2016	spring
D	D3	25/04/2016	spring
D	D5	06/07/2016	summer
D	D5	06/07/2016	summer
D	D5	06/07/2016	summer
D	D5	06/07/2016	summer
D	D5	06/07/2016	summer
D	D5	06/07/2016	summer
D	D5	06/07/2016	summer
D	D5	06/07/2016	summer
D	D5	06/07/2016	summer
D	D5	06/07/2016	summer
D	D5	06/07/2016	summer
D	D5	06/07/2016	summer
D	D5	06/07/2016	summer
D	D5	06/07/2016	summer
D	D5	06/07/2016	summer
D	D5	06/07/2016	summer
D	D5	06/07/2016	summer
D	D5	06/07/2016	summer
D	D5	06/07/2016	summer
D	D5	06/07/2016	summer
D	D5	06/07/2016	summer
D	D5	06/07/2016	summer
D	D5	06/07/2016	summer
D	D5	06/07/2016	summer
D	D5	06/07/2016	summer
D	D5	06/07/2016	summer
D	D5	06/07/2016	summer
D	D5	06/07/2016	summer
D	D5	06/07/2016	summer
D	D5	06/07/2016	summer
D	D6	06/07/2016	summer
D	D6	06/07/2016	summer
D	D6	06/07/2016	summer
D	D6	06/07/2016	summer
D	D6	06/07/2016	summer
D	D6	06/07/2016	summer
D	D6	06/07/2016	summer
D	D6	06/07/2016	summer
D	D6	06/07/2016	summer
D	D6	06/07/2016	summer
D	D6	06/07/2016	summer
D	D6	06/07/2016	summer
D	D6	06/07/2016	summer
D	D6	06/07/2016	summer
D	D6	06/07/2016	summer
D	D6	06/07/2016	summer
D	D6	06/07/2016	summer
D	D6	06/07/2016	summer
D	D6	06/07/2016	summer
D	D6	06/07/2016	summer
D	D6	06/07/2016	summer
D	D6	06/07/2016	summer
D	D6	06/07/2016	summer
D	D6	06/07/2016	summer
D	D6	06/07/2016	summer
D	D6	06/07/2016	summer
D	D1	07/07/2016	summer
D	D1	07/07/2016	summer
D	D1	07/07/2016	summer
D	D1	07/07/2016	summer
D	D1	07/07/2016	summer
D	D1	07/07/2016	summer
D	D1	07/07/2016	summer
D	D1	07/07/2016	summer
D	D1	07/07/2016	summer
D	D1	07/07/2016	summer
D	D2	07/07/2016	summer
D	D2	07/07/2016	summer
D	D2	07/07/2016	summer
D	D2	07/07/2016	summer
D	D2	07/07/2016	summer
D	D2	07/07/2016	summer
D	D2	07/07/2016	summer
D	D2	07/07/2016	summer
D	D2	07/07/2016	summer
D	D3	07/07/2016	summer
D	D3	07/07/2016	summer
D	D3	07/07/2016	summer
D	D3	07/07/2016	summer
D	D3	07/07/2016	summer
D	D3	07/07/2016	summer
D	D3	07/07/2016	summer
D	D3	07/07/2016	summer
D	D3	07/07/2016	summer
D	D3	07/07/2016	summer
D	D3	07/07/2016	summer
D	D3	07/07/2016	summer
D	D3	07/07/2016	summer
D	D3	07/07/2016	summer
D	D3	07/07/2016	summer
D	D4	07/07/2016	summer
D	D4	07/07/2016	summer
D	D4	07/07/2016	summer
D	D4	07/07/2016	summer
D	D4	07/07/2016	summer
D	D4	07/07/2016	summer
D	D4	07/07/2016	summer
D	D4	07/07/2016	summer
D	D4	07/07/2016	summer
D	D4	07/07/2016	summer
D	D4	07/07/2016	summer
D	D4	07/07/2016	summer
D	D4	07/07/2016	summer
D	D4	07/07/2016	summer
D	D4	07/07/2016	summer
D	D4	07/07/2016	summer
D	D4	07/07/2016	summer
D	D4	07/07/2016	summer
D	D4	07/07/2016	summer
D	D4	07/07/2016	summer
D	D4	07/07/2016	summer
D	D1	07/09/2016	autumn
D	D2	07/09/2016	autumn
D	D3	07/09/2016	autumn
D	D4	07/09/2016	autumn
D	D5	07/09/2016	autumn
D	D6	07/09/2016	autumn
D	D1	07/04/2017	spring
D	D2	07/04/2017	spring
D	D3	07/04/2017	spring
D	D4	07/04/2017	spring
D	D5	07/04/2017	spring
D	D6	07/04/2017	spring
D	D4	30/05/2017	spring
D	D5	30/05/2017	spring
D	D6	30/05/2017	spring
D	D1	31/05/2017	spring
D	D2	31/05/2017	spring
D	D3	31/05/2017	spring
D	D1	12/07/2017	summer
D	D2	12/07/2017	summer
D	D3	12/07/2017	summer
D	D4	13/07/2017	summer
D	D5	13/07/2017	summer
D	D6	13/07/2017	summer
D	D1	27/10/2017	autumn
D	D2	27/10/2017	autumn
D	D3	27/10/2017	autumn
D	D4	27/10/2017	autumn
D	D5	27/10/2017	autumn
D	D6	27/10/2017	autumn
D	D1	10/04/2018	spring
D	D2	10/04/2018	spring
D	D3	10/04/2018	spring
D	D4	10/04/2018	spring
D	D5	10/04/2018	spring
D	D6	10/04/2018	spring
D	D1	22/05/2018	spring
D	D2	22/05/2018	spring
D	D3	22/05/2018	spring
D	D4	22/05/2018	spring
D	D5	22/05/2018	spring
D	D6	22/05/2018	spring
D	D1	04/07/2018	summer
D	D1	04/07/2018	summer
D	D1	04/07/2018	summer
D	D1	04/07/2018	summer
D	D1	04/07/2018	summer
D	D2	04/07/2018	summer
D	D2	04/07/2018	summer
D	D2	04/07/2018	summer
D	D2	04/07/2018	summer
D	D2	04/07/2018	summer
D	D2	04/07/2018	summer
D	D3	04/07/2018	summer
D	D3	04/07/2018	summer
D	D3	04/07/2018	summer
D	D3	04/07/2018	summer
D	D3	04/07/2018	summer
D	D3	04/07/2018	summer
D	D3	04/07/2018	summer
D	D3	04/07/2018	summer
D	D4	04/07/2018	summer
D	D4	04/07/2018	summer
D	D4	04/07/2018	summer
D	D4	04/07/2018	summer
D	D4	04/07/2018	summer
D	D4	04/07/2018	summer
D	D4	04/07/2018	summer
D	D4	04/07/2018	summer
[truncated: 2,205 more rows]

## Sheet: Coastal stations sampling plan
Transect	Station	Date (DD/MM/YYYY)	Season
DOUARNENEZ	D1	23/01/2013	winter
DOUARNENEZ	D1	19/03/2013	spring
DOUARNENEZ	D1	03/04/2013	spring
DOUARNENEZ	D1	19/04/2013	spring
DOUARNENEZ	D1	02/05/2013	spring
DOUARNENEZ	D1	03/06/2013	summer
DOUARNENEZ	D1	18/06/2013	summer
DOUARNENEZ	D1	17/07/2013	summer
DOUARNENEZ	D1	31/07/2013	summer
DOUARNENEZ	D1	13/08/2013	summer
DOUARNENEZ	D1	29/08/2013	summer
DOUARNENEZ	D1	12/09/2013	autumn
DOUARNENEZ	D1	30/09/2013	autumn
DOUARNENEZ	D1	15/10/2013	autumn
DOUARNENEZ	D1	30/10/2013	autumn
DOUARNENEZ	D1	25/11/2013	autumn
DOUARNENEZ	D1	10/12/2013	winter
DOUARNENEZ	D1	07/02/2014	winter
DOUARNENEZ	D1	10/03/2014	spring
DOUARNENEZ	D1	08/04/2014	spring
DOUARNENEZ	D1	09/05/2014	spring
DOUARNENEZ	D1	06/06/2014	summer
DOUARNENEZ	D1	07/07/2014	summer
DOUARNENEZ	D1	21/07/2014	summer
DOUARNENEZ	D1	20/08/2014	summer
DOUARNENEZ	D1	05/09/2014	autumn
DOUARNENEZ	D1	03/10/2014	autumn
DOUARNENEZ	D1	04/11/2014	autumn
DOUARNENEZ	D1	03/12/2014	winter
DOUARNENEZ	D1	13/01/2015	winter
DOUARNENEZ	D1	27/01/2015	winter
DOUARNENEZ	D1	12/02/2015	winter
DOUARNENEZ	D1	13/03/2015	spring
DOUARNENEZ	D1	30/03/2015	spring
DOUARNENEZ	D1	13/04/2015	spring
DOUARNENEZ	D1	28/04/2015	spring
DOUARNENEZ	D1	12/05/2015	spring
DOUARNENEZ	D1	26/05/2015	spring
DOUARNENEZ	D1	12/06/2015	summer
DOUARNENEZ	D1	26/06/2015	summer
DOUARNENEZ	D1	27/07/2015	summer
DOUARNENEZ	D1	10/08/2015	summer
DOUARNENEZ	D1	26/08/2015	summer
DOUARNENEZ	D1	07/09/2015	autumn
DOUARNENEZ	D1	24/09/2015	autumn
DOUARNENEZ	D1	23/10/2015	autumn
DOUARNENEZ	D1	03/11/2015	autumn
DOUARNENEZ	D1	17/11/2015	autumn
DOUARNENEZ	D1	07/12/2015	winter
DOUARNENEZ	D1	21/12/2015	winter
DOUARNENEZ	D1	06/01/2016	winter
DOUARNENEZ	D1	17/03/2016	spring
DOUARNENEZ	D1	31/05/2016	spring
DOUARNENEZ	D1	28/06/2016	summer
DOUARNENEZ	D1	10/08/2016	summer
DOUARNENEZ	D1	26/08/2016	summer
DOUARNENEZ	D1	12/10/2016	autumn
DOUARNENEZ	D1	24/10/2016	autumn
DOUARNENEZ	D1	22/11/2016	autumn
DOUARNENEZ	D1	07/12/2016	winter
DOUARNENEZ	D1	04/01/2017	winter
DOUARNENEZ	D1	24/01/2017	winter
DOUARNENEZ	D1	06/02/2017	winter
DOUARNENEZ	D1	20/02/2017	winter
DOUARNENEZ	D1	07/03/2017	spring
DOUARNENEZ	D1	24/03/2017	spring
DOUARNENEZ	D1	18/04/2017	spring
DOUARNENEZ	D1	02/05/2017	spring
DOUARNENEZ	D1	19/05/2017	spring
DOUARNENEZ	D1	19/06/2017	summer
DOUARNENEZ	D1	03/07/2017	summer
DOUARNENEZ	D1	18/07/2017	summer
DOUARNENEZ	D1	01/08/2017	summer
DOUARNENEZ	D1	16/08/2017	summer
DOUARNENEZ	D1	30/08/2017	summer
DOUARNENEZ	D1	14/09/2017	autumn
DOUARNENEZ	D1	27/09/2017	autumn
DOUARNENEZ	D1	13/10/2017	autumn
DOUARNENEZ	D1	14/11/2017	autumn
DOUARNENEZ	D1	27/11/2017	autumn
DOUARNENEZ	D1	12/12/2017	winter
DOUARNENEZ	D1	26/12/2017	winter
DOUARNENEZ	D1	26/01/2018	winter
DOUARNENEZ	D1	08/02/2018	winter
DOUARNENEZ	D1	23/02/2018	winter
DOUARNENEZ	D1	08/03/2018	spring
DOUARNENEZ	D1	26/03/2018	spring
DOUARNENEZ	D1	23/04/2018	spring
DOUARNENEZ	D1	08/05/2018	spring
DOUARNENEZ	D1	05/06/2018	summer
DOUARNENEZ	D1	21/06/2018	summer
DOUARNENEZ	D1	06/08/2018	summer
DOUARNENEZ	D1	20/08/2018	summer
DOUARNENEZ	D1	05/09/2018	autumn
DOUARNENEZ	D1	01/10/2018	autumn
DOUARNENEZ	D1	31/10/2018	autumn
DOUARNENEZ	D1	16/11/2018	autumn
DOUARNENEZ	D1	30/11/2018	autumn
DOUARNENEZ	D1	17/12/2018	winter
DOUARNENEZ	D1	12/04/2019	spring
DOUARNENEZ	D1	29/04/2019	spring
DOUARNENEZ	D1	13/05/2019	spring
DOUARNENEZ	D1	12/06/2019	summer
DOUARNENEZ	D1	26/06/2019	summer
DOUARNENEZ	D1	26/07/2019	summer
DOUARNENEZ	D1	12/08/2019	summer
DOUARNENEZ	D1	23/08/2019	summer
DOUARNENEZ	D1	10/09/2019	autumn
DOUARNENEZ	D1	23/09/2019	autumn
DOUARNENEZ	D1	07/10/2019	autumn
DOUARNENEZ	D1	06/11/2019	autumn
DOUARNENEZ	D1	19/11/2019	autumn
DOUARNENEZ	D1	21/01/2020	winter
DOUARNENEZ	D1	19/02/2020	winter
DOUARNENEZ	D1	14/05/2020	spring
DOUARNENEZ	D1	17/06/2020	summer
DOUARNENEZ	D1	18/07/2020	summer
DOUARNENEZ	D1	12/08/2020	summer
DOUARNENEZ	D1	27/08/2020	summer
DOUARNENEZ	D1	13/10/2020	autumn
DOUARNENEZ	D1	23/10/2020	autumn
DOUARNENEZ	D1	09/11/2020	autumn
DOUARNENEZ	D1	24/11/2020	autumn
DOUARNENEZ	D1	05/03/2021	spring
DOUARNENEZ	D1	06/04/2021	spring
DOUARNENEZ	D1	19/04/2021	spring
DOUARNENEZ	D1	03/05/2021	spring
DOUARNENEZ	D1	18/05/2021	spring
DOUARNENEZ	D1	18/06/2021	summer
DOUARNENEZ	D1	16/07/2021	summer
DOUARNENEZ	D1	18/08/2021	summer
DOUARNENEZ	D1	01/09/2021	autumn
DOUARNENEZ	D1	14/09/2021	autumn
DOUARNENEZ	D1	27/10/2021	autumn
DOUARNENEZ	D1	29/11/2021	autumn
MOLENE	MOLENE	21/05/2011	spring
MOLENE	MOLENE	27/05/2011	spring
MOLENE	MOLENE	08/06/2011	summer
MOLENE	MOLENE	29/06/2011	summer
MOLENE	MOLENE	13/07/2011	summer
MOLENE	MOLENE	27/07/2011	summer
MOLENE	MOLENE	07/08/2011	summer
MOLENE	MOLENE	24/08/2011	summer
MOLENE	MOLENE	08/09/2011	autumn
MOLENE	MOLENE	23/09/2011	autumn
MOLENE	MOLENE	06/10/2011	autumn
MOLENE	MOLENE	20/10/2011	autumn
MOLENE	MOLENE	04/11/2011	autumn
MOLENE	MOLENE	11/11/2011	autumn
MOLENE	MOLENE	06/12/2011	winter
MOLENE	MOLENE	19/12/2011	winter
MOLENE	MOLENE	08/01/2013	winter
MOLENE	MOLENE	14/02/2013	winter
MOLENE	MOLENE	19/02/2013	winter
MOLENE	MOLENE	19/04/2013	spring
MOLENE	MOLENE	07/05/2013	spring
MOLENE	MOLENE	23/05/2013	spring
MOLENE	MOLENE	21/06/2013	summer
MOLENE	MOLENE	04/07/2013	summer
MOLENE	MOLENE	17/07/2013	summer
MOLENE	MOLENE	31/07/2013	summer
MOLENE	MOLENE	04/08/2013	summer
MOLENE	MOLENE	30/08/2013	summer
MOLENE	MOLENE	13/09/2013	autumn
MOLENE	MOLENE	27/09/2013	autumn
MOLENE	MOLENE	15/10/2013	autumn
MOLENE	MOLENE	31/10/2013	autumn
MOLENE	MOLENE	14/11/2013	autumn
MOLENE	MOLENE	10/12/2013	winter
MOLENE	MOLENE	16/01/2015	winter
MOLENE	MOLENE	16/02/2015	winter
MOLENE	MOLENE	13/03/2015	spring
MOLENE	MOLENE	13/04/2015	spring
MOLENE	MOLENE	13/05/2015	spring
MOLENE	MOLENE	10/06/2015	summer
MOLENE	MOLENE	10/07/2015	summer
MOLENE	MOLENE	11/08/2015	summer
MOLENE	MOLENE	07/09/2015	autumn
MOLENE	MOLENE	07/10/2015	autumn
MOLENE	MOLENE	09/11/2015	autumn
MOLENE	MOLENE	07/12/2015	winter
MOLENE	MOLENE	24/01/2017	winter
MOLENE	MOLENE	21/02/2017	winter
MOLENE	MOLENE	23/03/2017	spring
MOLENE	MOLENE	19/04/2017	spring
MOLENE	MOLENE	19/05/2017	spring
MOLENE	MOLENE	19/06/2017	summer
MOLENE	MOLENE	18/07/2017	summer
MOLENE	MOLENE	17/08/2017	summer
MOLENE	MOLENE	14/09/2017	autumn
MOLENE	MOLENE	28/09/2017	autumn
MOLENE	MOLENE	30/10/2017	autumn
MOLENE	MOLENE	29/11/2017	autumn
MOLENE	MOLENE	13/03/2018	spring
MOLENE	MOLENE	09/04/2018	spring
MOLENE	MOLENE	25/04/2018	spring
MOLENE	MOLENE	23/05/2018	spring
MOLENE	MOLENE	22/06/2018	summer
MOLENE	MOLENE	23/07/2018	summer
MOLENE	MOLENE	20/08/2018	summer
MOLENE	MOLENE	05/09/2018	autumn
MOLENE	MOLENE	05/11/2018	autumn
MOLENE	MOLENE	01/03/2019	spring
MOLENE	MOLENE	29/03/2019	spring
MOLENE	MOLENE	16/04/2019	spring
MOLENE	MOLENE	14/05/2019	spring
MOLENE	MOLENE	12/06/2019	summer
MOLENE	MOLENE	25/07/2019	summer
MOLENE	MOLENE	12/08/2019	summer
MOLENE	MOLENE	10/09/2019	autumn
MOLENE	MOLENE	08/10/2019	autumn
MOLENE	MOLENE	04/03/2020	spring
MOLENE	MOLENE	13/05/2020	spring
MOLENE	MOLENE	29/05/2020	spring
MOLENE	MOLENE	15/06/2020	summer
MOLENE	MOLENE	15/07/2020	summer
MOLENE	MOLENE	12/08/2020	summer
MOLENE	MOLENE	14/09/2020	autumn
MOLENE	MOLENE	12/10/2020	autumn
MOLENE	MOLENE	10/11/2020	autumn
MOLENE	MOLENE	08/03/2021	spring
MOLENE	MOLENE	24/03/2021	spring
MOLENE	MOLENE	22/04/2021	spring
MOLENE	MOLENE	19/05/2021	spring
MOLENE	MOLENE	18/06/2021	summer
MOLENE	MOLENE	20/07/2021	summer
MOLENE	MOLENE	16/08/2021	summer
MOLENE	MOLENE	14/09/2021	autumn
MOLENE	MOLENE	15/10/2021	autumn
SEIN	SEIN	17/04/2012	spring
SEIN	SEIN	30/04/2012	spring
SEIN	SEIN	19/05/2012	spring
SEIN	SEIN	29/05/2012	spring
SEIN	SEIN	14/06/2012	summer
SEIN	SEIN	29/06/2012	summer
SEIN	SEIN	12/07/2012	summer
SEIN	SEIN	27/07/2012	summer
SEIN	SEIN	10/08/2012	summer
SEIN	SEIN	28/08/2012	summer
SEIN	SEIN	11/09/2012	autumn
SEIN	SEIN	24/09/2012	autumn
SEIN	SEIN	08/10/2012	autumn
SEIN	SEIN	24/10/2012	autumn
SEIN	SEIN	08/01/2013	winter
SEIN	SEIN	22/01/2013	winter
SEIN	SEIN	04/06/2013	summer
SEIN	SEIN	18/06/2013	summer
SEIN	SEIN	05/07/2013	summer
SEIN	SEIN	18/07/2013	summer
SEIN	SEIN	16/08/2013	summer
SEIN	SEIN	13/09/2013	autumn
SEIN	SEIN	14/10/2013	autumn
SEIN	SEIN	29/10/2013	autumn
SEIN	SEIN	12/11/2013	autumn
SEIN	SEIN	28/11/2013	autumn
SEIN	SEIN	16/01/2015	winter
SEIN	SEIN	13/02/2015	winter
SEIN	SEIN	16/03/2015	spring
SEIN	SEIN	27/03/2015	spring
SEIN	SEIN	14/04/2015	spring
SEIN	SEIN	27/04/2015	spring
SEIN	SEIN	12/05/2015	spring
SEIN	SEIN	27/05/2015	spring
SEIN	SEIN	25/06/2015	summer
SEIN	SEIN	10/07/2015	summer
SEIN	SEIN	23/07/2015	summer
SEIN	SEIN	11/08/2015	summer
SEIN	SEIN	24/08/2015	summer
SEIN	SEIN	10/09/2015	autumn
SEIN	SEIN	24/09/2015	autumn
SEIN	SEIN	07/10/2015	autumn
SEIN	SEIN	04/11/2015	autumn
SEIN	SEIN	22/12/2015	winter
SEIN	SEIN	19/01/2016	winter
SEIN	SEIN	16/02/2016	winter
SEIN	SEIN	04/03/2016	spring
SEIN	SEIN	18/03/2016	spring
SEIN	SEIN	01/04/2016	spring
SEIN	SEIN	14/04/2016	spring
SEIN	SEIN	02/05/2016	spring
SEIN	SEIN	15/05/2016	spring
SEIN	SEIN	31/05/2016	spring
SEIN	SEIN	16/06/2016	summer
SEIN	SEIN	29/06/2016	summer
SEIN	SEIN	13/07/2016	summer
SEIN	SEIN	28/07/2016	summer
SEIN	SEIN	11/08/2016	summer
SEIN	SEIN	26/08/2016	summer
SEIN	SEIN	11/10/2016	autumn
SEIN	SEIN	23/11/2016	autumn
SEIN	SEIN	08/12/2016	winter
SEIN	SEIN	22/12/2016	winter
SEIN	SEIN	24/01/2017	winter
SEIN	SEIN	05/02/2017	winter
SEIN	SEIN	20/02/2017	winter
SEIN	SEIN	20/04/2017	spring
SEIN	SEIN	03/05/2017	spring
SEIN	SEIN	15/06/2017	summer
SEIN	SEIN	03/07/2017	summer
SEIN	SEIN	16/08/2017	summer
SEIN	SEIN	14/09/2017	autumn
SEIN	SEIN	13/10/2017	autumn
SEIN	SEIN	13/11/2017	autumn
SEIN	SEIN	13/03/2018	spring
SEIN	SEIN	09/04/2018	spring
SEIN	SEIN	07/05/2018	spring
SEIN	SEIN	05/06/2018	summer
SEIN	SEIN	06/07/2018	summer
SEIN	SEIN	06/08/2018	summer
SEIN	SEIN	04/09/2018	autumn
SEIN	SEIN	03/10/2018	autumn
SEIN	SEIN	16/10/2018	autumn
SEIN	SEIN	29/03/2019	spring
SEIN	SEIN	11/04/2019	spring
SEIN	SEIN	14/05/2019	spring
SEIN	SEIN	14/06/2019	summer
SEIN	SEIN	10/07/2019	summer
SEIN	SEIN	12/08/2019	summer
SEIN	SEIN	09/09/2019	autumn
SEIN	SEIN	24/09/2019	autumn
SEIN	SEIN	23/10/2019	autumn
SEIN	SEIN	15/05/2020	spring
SEIN	SEIN	15/06/2020	summer
SEIN	SEIN	01/07/2020	summer
SEIN	SEIN	15/07/2020	summer
SEIN	SEIN	28/07/2020	summer
SEIN	SEIN	12/08/2020	summer
SEIN	SEIN	09/09/2020	autumn
SEIN	SEIN	09/10/2020	autumn
SEIN	SEIN	10/11/2020	autumn
