# Supplementary material for: Long-term plankton and environmental monitoring dataset from the marine protected area of the Iroise Marine Natural Park (2010–2023) in the Iroise Sea, North Atlantic
Source: Copernicus journal article supplement (doi:10.5194/essd-17-6583-2025), 2025-11-27
Supplement: Supplementary file [file essd-17-6583-2025-supplement-title-page.pdf › essd-17-6583-2025-supplement-title-page.pdf]

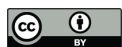

*Supplement of*

**Uncertainties in fertilizer-induced emissions of soil nitrogen oxide and the associated impacts on ground-level ozone and methane**

**Cheng Gong et al.**

*Correspondence to:* Cheng Gong ([cgong@bgc-jena.mpg.de](mailto:cgong@bgc-jena.mpg.de))

The copyright of individual parts of the supplement might differ from the article licence.
